# Supplementary material for: Potential of Low Dose Leuco-Methylthioninium Bis(Hydromethanesulphonate) (LMTM) Monotherapy for Treatment of Mild Alzheimer’s Disease: Cohort Analysis as Modified Primary Outcome in a Phase III Clinical Trial
Source: PubMed Central journal article supplement (PMC5734125; doi:10.3233/jad-170560), 2017-11-28

## **SUPPLEMENTARY MATERIAL**

### **Potential of low dose leuco-methylthioninium bis(hydromethanesulphonate) (LMTM) monotherapy for treatment of mild Alzheimer's disease: observational cohort analysis as modified primary outcome in a phase III clinical trial**

Gordon K. Wilcock, Serge Gauthier, Giovanni B. Frisoni, Jianping Jia, Jiri H. Hardlund, Hans J. Moebius, Peter Bentham, Karin A. Kook, Bjoern O. Schelter, Damon J. Wischik, Charles S. Davis, Roger T. Staff, Vesna Vuksanovic, Trevor S. Ahearn, Luc Bracoud, Kohkan Shamsi, Ken Marek, John Seibyl, Gernot Reidel, John M.D. Storey, Charles R. Harrington, Claude M Wischik

**Correspondence to:** Claude M Wischik, School of Medicine, Medical Sciences and Nutrition, University of Aberdeen, Aberdeen AB25 2ZP, UK. E-mail: cmw@taurx.com

**Supplementary Tables 1-6**

**Supplementary Figure 1**

### Supplementary Table 1

Comparison of monotherapy versus add-on treatment differences for LMTM 4 mg twice a day and 100 mg twice a day.

|          |        | Decline for 4 mg twice a day as add-on therapy (n=309) | Difference for 4 mg twice a day, as monotherapy (n=79) | Decline for 100 mg twice a day as add-on therapy (n=297) | Difference for 100 mg twice a day as monotherapy (n=76) | p value for monotherapy difference comparison |
|----------|--------|--------------------------------------------------------|--------------------------------------------------------|----------------------------------------------------------|---------------------------------------------------------|-----------------------------------------------|
| ADAS-cog | Mean   | 7.13                                                   | -4.22                                                  | 7.24                                                     | -4.08                                                   | 0.8002                                        |
|          | 95% CI | 6.09, 8.18                                             | -6.19, -2.24                                           | 6.08, 8.40                                               | -6.07, -2.08                                            |                                               |
| ADCS-ADL | Mean   | -9.17                                                  | 4.85                                                   | -9.99                                                    | 5.27                                                    | 0.7358                                        |
|          | 95% CI | -10.52, -7.82                                          | 2.31, 7.40                                             | -11.50, -8.49                                            | 2.70, 7.84                                              |                                               |

Data expressed as mean with 95% CI.

### Supplementary Table 2a

Co-primary outcomes examining LMTM 100 mg twice a day as monotherapy compared with the control arm as randomized (Comparison A), and LMTM 4 mg twice a day as monotherapy compared with 4 mg twice a day as add-on to existing Alzheimer's disease treatments (Comparison B) after removal of patients taking a cholinesterase inhibitor in combination with memantine from the analysis.

|          |        | Comparison A                                                     |                                                          |         | Comparison B                                                 |                                                        |         |
|----------|--------|------------------------------------------------------------------|----------------------------------------------------------|---------|--------------------------------------------------------------|--------------------------------------------------------|---------|
|          |        | Change from baseline for 4 mg twice a day, as randomized (n=388) | Difference for 100 mg twice a day, as monotherapy (n=82) | p value | Change from baseline for 4 mg twice a day, as add-on (n=316) | Difference for 4 mg twice a day, as monotherapy (n=80) | p value |
| ADAS-cog | Mean   | 5.79                                                             | -2.43                                                    | 0.0334  | 6.84                                                         | -4.08                                                  | 0.0001  |
|          | 95% CI | 4.70, 6.88                                                       | -4.68, -0.19                                             |         | 5.63, 8.05                                                   | -6.12, -2.05                                           |         |
| ADCS-ADL | Mean   | -7.84                                                            | 3.37                                                     | 0.0235  | -9.10                                                        | 4.86                                                   | 0.0003  |
|          | 95% CI | -9.26, -6.42                                                     | 0.45, 6.29                                               |         | -10.67, -7.52                                                | 2.24, 7.48                                             |         |

Data expressed as mean with 95% CI.

### Supplementary Table 2b

Co-primary outcomes examining LMTM 100 mg twice a day as monotherapy compared with 100 mg twice a day as add-on to existing Alzheimer's disease treatments (Comparison C) after removal of patients taking a cholinesterase inhibitor in combination with memantine from the analysis.

|          |        | Comparison C                                                   |                                                          |         |
|----------|--------|----------------------------------------------------------------|----------------------------------------------------------|---------|
|          |        | Change from baseline for 100 mg twice a day, as add-on (n=388) | Difference for 100 mg twice a day, as monotherapy (n=82) | p value |
| ADAS-cog | Mean   | 7.28                                                           | -3.93                                                    | 0.0002  |
|          | 95% CI | 5.97, 8.60                                                     | -5.98, -1.88                                             |         |
| ADCS-ADL | Mean   | -9.99                                                          | 5.22                                                     | 0.0001  |
|          | 95% CI | -11.40, -7.98                                                  | 2.58, 7.86                                               |         |

Data expressed as mean with 95% CI.

### Supplementary Table 3a

Comparisons for primary and secondary outcomes according to CDR severity at baseline. Differences are shown with respect to the control change from baseline at 78 weeks as specified for comparisons A and B. Two parallel implementations of sequential tests were prespecified to examine LMTM 100 mg twice a day as monotherapy compared with the control arm as randomized (comparison A), and LMTM 4 mg twice a day as monotherapy compared with 4 mg twice a day as add-on to existing Alzheimer's disease treatments (comparison B).

|                        |        | Comparison A |                                                         |                                                  |         | Comparison B |                                                     |                                                |         |
|------------------------|--------|--------------|---------------------------------------------------------|--------------------------------------------------|---------|--------------|-----------------------------------------------------|------------------------------------------------|---------|
|                        |        | Baseline     | Change from baseline for 4 mg twice a day as randomized | Difference for 100 mg twice a day as monotherapy | p value | Baseline     | Change from baseline for 4 mg twice a day as add-on | Difference for 4 mg twice a day as monotherapy | p value |
| <b>CDR 0.5</b>         |        |              | n=242                                                   | n=59                                             |         |              | n=181                                               | n=61                                           |         |
| ADAS-cog               | Mean   | 15.61        | 5.22                                                    | -2.19                                            | 0.0847  | 16.15        | 5.96                                                | -2.92                                          | 0.0108  |
|                        | 95% CI | 14.84, 16.38 | 4.01, 6.42                                              | -4.67, 0.30                                      |         | 15.30, 17.00 | 4.63, 7.29                                          | -5.17, -0.67                                   |         |
| ADCS-ADL               | Mean   | 69.85        | -6.33                                                   | 2.89                                             | 0.0682  | 69.51        | -7.38                                               | 4.08                                           | 0.0040  |
|                        | 95% CI | 69.15, 70.85 | -7.84, -4.82                                            | -0.22, 6.00                                      |         | 68.69, 70.33 | -9.05, -5.72                                        | 1.31, 6.86                                     |         |
| LVV (cm <sup>3</sup> ) | Mean   | 49.60        | 6.84                                                    | -2.67                                            | 0.0003  | 53.03        | 7.65                                                | -2.88                                          | <0.0001 |
|                        | 95% CI | 46.59, 52.61 | 6.11, 7.56                                              | -4.13, -1.22                                     |         | 49.64, 56.42 | 6.85, 8.46                                          | -4.16, -1.59                                   |         |
| ADCS-CGIC              | Mean   |              | -0.91                                                   | 0.24                                             | 0.1160  |              | -1.02                                               | 0.44                                           | 0.0014  |
|                        | 95% CI |              | -1.04, -0.77                                            | -0.06, 0.54                                      |         |              | -1.17, -0.87                                        | 0.17, 0.71                                     |         |
| MMSE                   | Mean   | 23.62        | -2.68                                                   | 0.86                                             | 0.2272  | 23.61        | -3.06                                               | 1.48                                           | 0.0214  |
|                        | 95% CI | 23.38, 23.86 | -3.12, -2.04                                            | -0.54, 2.26                                      |         | 23.33, 23.89 | -3.77, -2.34                                        | 0.22, 2.74                                     |         |
| MADRS                  | Mean   | 4.92         | -0.06                                                   | -0.40                                            | 0.6323  | 4.98         | 0.11                                                | -0.69                                          | 0.3540  |
|                        | 95% CI | 4.32, 5.22   | -1.86, 0.71                                             | -2.03, 1.23                                      |         | 4.27, 5.69   | -0.68, 0.91                                         | -2.13, 0.76                                    |         |
| NPI                    | Mean   | 7.05         | 1.79                                                    | 0.26                                             | 0.8659  | 7.20         | 2.17                                                | -1.89                                          | 0.1732  |
|                        | 95% CI | 6.80, 8.10   | 0.56, 3.02                                              | -2.81, 3.34                                      |         | 5.99, 8.41   | 0.83, 3.52                                          | 4.61, 0.83                                     |         |
| <b>CDR 1.0</b>         |        |              | n=146                                                   | n=17                                             |         |              | n=128                                               | n=18                                           |         |
| ADAS-cog               | Mean   | 20.51        | 8.24                                                    | -4.87                                            | 0.0396  | 20.55        | 8.87                                                | -6.69                                          | 0.0020  |
|                        | 95% CI | 19.22, 21.80 | 6.61, 9.88                                              | -9.52, -0.23                                     |         | 19.18, 21.92 | 7.17, 10.56                                         | -10.94, -2.45                                  |         |
| ADCS-ADL               | Mean   | 63.33        | -8.21                                                   | 3.48, 6.2                                        | 0.0157  | 62.86        | -9.17                                               | 4.85                                           | 0.0002  |
|                        | 95% CI | 61.85, 64.81 | -9.46, -6.95                                            | 0.66, 6.30                                       |         | 61.26, 64.46 | -10.52, -7.82                                       | 2.31, 7.40                                     |         |
| LVV (cm <sup>3</sup> ) | Mean   | 53.31        | 8.24                                                    | -2.48                                            | 0.0871  | 54.50        | 8.52                                                | -3.15                                          | 0.0186  |
|                        | 95% CI | 48.95, 57.67 | 7.20, 9.29                                              | -5.31, 0.36                                      |         | 49.77, 59.23 | 7.45, 9.60                                          | -5.77, -0.53                                   |         |
| ADCS-CGIC              | Mean   |              | -1.00                                                   | 0.27                                             | 0.0521  |              | -1.09                                               | 0.42                                           | 0.0007  |
|                        | 95% CI |              | -1.11, -0.89                                            | -0.00, 0.53                                      |         |              | -1.21, -0.96                                        | 0.17, 0.66                                     |         |
| MMSE                   | Mean   | 22.12        | -3.97                                                   | 2.51                                             | 0.0632  | 21.99        | -4.06                                               | 0.98                                           | 0.4139  |
|                        | 95% CI | 21.83, 22.41 | -4.82, -3.12                                            | -0.14, 5.17                                      |         | 21.69, 22.29 | -4.96, -3.17                                        | -1.37, 3.33                                    |         |
| MADRS                  | Mean   | 4.63         | 0.64                                                    | -0.15                                            | 0.9148  | 4.36         | 0.73                                                | -1.00                                          | 0.4227  |
|                        | 95% CI | 3.90, 5.36   | -0.20, 1.48                                             | -2.85, 2.56                                      |         | 3.62, 5.10   | -0.15, 1.60                                         | -3.45, 1.45                                    |         |
| NPI                    | Mean   | 9.37         | 1.79                                                    | 0.26                                             | 0.8659  | 9.63         | 2.17                                                | -1.89                                          | 0.1732  |
|                        | 95% CI | 7.66, 11.08  | 0.56, 3.02                                              | -2.81, 3.34                                      |         | 7.75, 11.51  | 0.83, 3.52                                          | 4.61, 0.83                                     |         |

### Supplementary Table 3b

Comparisons for primary and secondary outcomes according to CDR severity at baseline, comparing 100 mg twice a day as monotherapy with the same dose as add-on to existing treatments (Comparison C).

|                        |        | Baseline     | Change from baseline<br>for 100 mg twice a day<br>as add-on | Difference for 100<br>mg twice a day as<br>monotherapy | p value |
|------------------------|--------|--------------|-------------------------------------------------------------|--------------------------------------------------------|---------|
| <b>CDR 0.5</b>         |        |              | n=242                                                       | n=59                                                   |         |
| ADAS-cog               | Mean   | 16.93        | 6.36                                                        | -3.33                                                  | 0.0038  |
|                        | 95% CI | 15.33, 17.27 | 4.92, 7.39                                                  | -5.58, -1.07                                           |         |
| ADCS-ADL               | Mean   | 69.12        | -7.87                                                       | 4.43                                                   | 0.0019  |
|                        | 95% CI | 69.16, 70.08 | -9.68, -6.06                                                | 1.64, 7.22                                             |         |
| LVV (cm <sup>3</sup> ) | Mean   | 45.47        | 7.20                                                        | -3.04                                                  | <0.0001 |
|                        | 95% CI | 42.35, 48.59 | 6.33, 8.07                                                  | -4.31, -1.76                                           |         |
| CGIC                   | Mean   |              | -0.97                                                       | 0.30                                                   | 0.0362  |
|                        | 95% CI |              | -1.14, -0.81                                                | 0.02, 0.59                                             |         |
| MMSE                   | Mean   | 23.27        | -3.37                                                       | 1.63                                                   | 0.159   |
|                        | 95% CI | 22.97, 23.57 | -4.17, -2.56                                                | 0.31, 2.96                                             |         |
| <b>CDR 1.0</b>         |        |              | n = 146                                                     | n = 17                                                 |         |
| ADAS-cog               | Mean   | 20.40        | 8.71                                                        | -5.35                                                  | 0.0164  |
|                        | 95% CI | 19.19, 21.61 | 6.75, 10.68                                                 | -9.71, -0.98                                           |         |
| ADCS-ADL               | Mean   | 62.49        | -13.13                                                      | 5.62                                                   | 0.0624  |
|                        | 95% CI | 61.06, 63.92 | -15.82, -10.44                                              | -0.29, 11.54                                           |         |
| LVV (cm <sup>3</sup> ) | Mean   | 55.86        | 8.57                                                        | -2.80                                                  | 0.0364  |
|                        | 95% CI | 51.17, 60.55 | 7.32, 9.82                                                  | -5.42, -0.18                                           |         |
| CGIC                   | Mean   |              | -1.33                                                       | 0.40                                                   | 0.1613  |
|                        | 95% CI |              | -1.57, -1.09                                                | -0.16, 0.97                                            |         |
| MMSE                   | Mean   | 22.14        | -4.56                                                       | 3.10                                                   | 0.0198  |
|                        | 95% CI | 21.81, 22.47 | -5.60, -3.52                                                | 0.59, 5.71                                             |         |

### Supplementary Table 4

Two time-point analyses to determine whether observational cohort differences for Comparisons A, B, and C of the co-primary outcomes (ADAS-cog and ADCS-ADL) increase at 18 months compared with 9 months.

| Comparison | Outcome  |                | Effect size  |              |                           | <i>p</i> -value for two time-point difference |
|------------|----------|----------------|--------------|--------------|---------------------------|-----------------------------------------------|
|            |          |                | 9 months     | 18 months    | Two time-point difference |                                               |
| A          | ADAS-cog | Mean           | -1.32        | -3.14        | -2.43                     | 0.0174                                        |
|            |          | 95% CI         | -2.76, 0.13  | -5.32, -0.97 | -4.43, -0.43              |                                               |
|            |          | <i>p</i> value | 0.0735       | 0.0047       |                           |                                               |
|            | ADCS-ADL | Mean           | 1.70         | 3.48         | 2.37                      | 0.0866                                        |
|            |          | 95% CI         | -0.10, 3.50  | 0.66, 6.31   | -0.34, 5.09               |                                               |
|            |          | <i>p</i> value | 0.0639       | 0.0156       |                           |                                               |
| B          | ADAS-cog | Mean           | -1.91        | -4.22        | -3.07                     | 0.0006                                        |
|            |          | 95% CI         | -3.24, -0.59 | 6.19, -2.24  | 4.82, -1.32               |                                               |
|            |          | <i>p</i> value | 0.0047       | <0.0001      |                           |                                               |
|            | ADCS-ADL | Mean           | 1.40         | 4.85         | 4.60                      | 0.0001                                        |
|            |          | 95% CI         | -0.27, 3.07  | 2.31, 7.40   | 2.24, 6.97                |                                               |
|            |          | <i>p</i> value | 0.0995       | 0.0002       |                           |                                               |
| C          | ADAS-cog | Mean           | -1.77        | -4.08        | -3.17                     | 0.0039                                        |
|            |          | 95% CI         | -3.18, -0.37 | -6.07, -2.08 | -5.31, -1.02              |                                               |
|            |          | <i>p</i> value | 0.0132       | 0.0001       |                           |                                               |
|            | ADCS-ADL | Mean           | 1.82         | 5.27         | 4.38                      | 0.0026                                        |
|            |          | 95% CI         | 0.08, 3.55   | 2.70, 7.84   | 1.53, 7.22                |                                               |
|            |          | <i>p</i> value | 0.0406       | 0.0001       |                           |                                               |

### Supplementary Table 5a

Comparison of volumetric MRI outcomes according to CDR severity at baseline. Differences are shown with respect to the control change from baseline at 78 weeks as specified for comparisons A and B. Two parallel implementations of sequential tests were prespecified to examine LMTM 100 mg twice a day as monotherapy compared with the control arm as randomized (comparison A), and LMTM 4 mg twice a day as monotherapy compared with 4 mg twice a day as add-on to existing Alzheimer's disease treatments (comparison B).

|                        |        | Comparison A |                                                                  |                                                          |         | Comparison B |                                                              |                                                        |         |
|------------------------|--------|--------------|------------------------------------------------------------------|----------------------------------------------------------|---------|--------------|--------------------------------------------------------------|--------------------------------------------------------|---------|
|                        |        | Baseline     | Change from baseline for 4 mg twice a day, as randomized (n=388) | Difference for 100 mg twice a day, as monotherapy (n=82) | p value | Baseline     | Change from baseline for 4 mg twice a day, as add-on (n=316) | Difference for 4 mg twice a day, as monotherapy (n=80) | p value |
| <b>CDR 0.5</b>         |        |              |                                                                  |                                                          |         |              |                                                              |                                                        |         |
| LVV (cm <sup>3</sup> ) | Mean   | 48.03        | 6.84                                                             | -2.67                                                    | 0.0003  | 49.51        | 7.65                                                         | -2.88                                                  | <0.0001 |
|                        | 95% CI | 45.21, 50.85 | 6.11, 7.56                                                       | -4.13, -1.22                                             |         | 46.39, 52.63 | 6.85, 8.46                                                   | -4.16, -1.59                                           |         |
| WBV (cm <sup>3</sup> ) | Mean   | 980          | -20.46                                                           | 6.37                                                     | 0.0013  | 980          | -22.46                                                       | 7.26                                                   | <0.0001 |
|                        | 95% CI | 967, 993     | -22.30, -20.09                                                   | 2.49, 10.25                                              |         | 965, 995     | -24.52, -20.40                                               | 3.81, 10.70                                            |         |
| HV (mm <sup>3</sup> )  | Mean   | 3106         | -119                                                             | 20                                                       | 0.0705  | 3088         | -131                                                         | 40                                                     | 0.0001  |
|                        | 95% CI | 3036, 3176   | -130, -109                                                       | -2, 43                                                   |         | 3011, 3165   | -143, -119                                                   | 20, 60                                                 |         |
| <b>CDR 1.0</b>         |        |              |                                                                  |                                                          |         |              |                                                              |                                                        |         |
| LVV (cm <sup>3</sup> ) | Mean   | 50.89        | 8.24                                                             | -2.48                                                    | 0.0871  | 52.57        | 8.52                                                         | -3.15                                                  | 0.0186  |
|                        | 95% CI | 46.62, 55.16 | 7.20, 9.29                                                       | -5.31, -0.36                                             |         | 48.04, 57.10 | 7.45, 9.60                                                   | -5.77, -0.53                                           |         |
| WBV (cm <sup>3</sup> ) | Mean   | 955          | -21.83                                                           | 6.49                                                     | 0.0002  | 959          | -23.51                                                       | 7.77                                                   | <0.0001 |
|                        | 95% CI | 763, 1147    | -23.37, -20.29                                                   | 3.03, 9.96                                               |         | 939, 979     | -25.18, -21.84                                               | 4.64, 10.90                                            |         |
| HV (mm <sup>3</sup> )  | Mean   | 3008         | -121                                                             | 1                                                        | 0.9648  | 2877, 3093   | -125                                                         | 46                                                     | 0.0106  |
|                        | 95% CI | 2905, 3111   | -135, -108                                                       | -38, 40                                                  |         |              | -139, -111                                                   | 11, 82                                                 |         |



### Supplementary Table 5b.

Volumetric MRI outcomes comparing LMTM 100 mg twice a day as monotherapy with 100 mg twice a day as add-on to existing AD treatments (Comparison C).

|                        |        | Comparison C |                                                                |                                                          |         |
|------------------------|--------|--------------|----------------------------------------------------------------|----------------------------------------------------------|---------|
|                        |        | Baseline     | Change from baseline for 100 mg twice a day, as add-on (n=388) | Difference for 100 mg twice a day, as monotherapy (n=82) | p value |
| <b>CDR 0.5</b>         |        |              |                                                                |                                                          |         |
| LVV (cm <sup>3</sup> ) | Mean   | 44.47        | 7.20                                                           | -3.04                                                    | <0.0001 |
|                        | 95% CI | 43.52, 45.52 | 6.33, 8.07                                                     | -4.31, -1.76                                             |         |
| WBV (cm <sup>3</sup> ) | Mean   | 975          | -22.33                                                         | 8.24                                                     | <0.0001 |
|                        | 95% CI | 826, 1124    | -24.56, -20.09                                                 | 4.75, 11.73                                              |         |
| HV (mm <sup>3</sup> )  | Mean   | 3093         | -140                                                           | 41                                                       | 0.0001  |
|                        | 95% CI | 3012, 3174   | -153, -127                                                     | 21, 61                                                   |         |
| <b>CDR 1.0</b>         |        |              |                                                                |                                                          |         |
| LVV (cm <sup>3</sup> ) | Mean   | 53.44        | 8.57                                                           | -2.80                                                    | 0.0364  |
|                        | 95% CI | 49.00, 57.88 | 7.32, 9.82                                                     | -5.42, -0.18                                             |         |
| WBV (cm <sup>3</sup> ) | Mean   | 960          | -26.97                                                         | 7.99                                                     | 0.0326  |
|                        | 95% CI | 940, 980     | -30.28, -23.65                                                 | 0.75, 15.23                                              |         |
| HV (mm <sup>3</sup> )  | Mean   | 2881         | -140                                                           | 20                                                       | 0.2854  |
|                        | 95% CI | 2767, 2995   | -157, -124                                                     | -17, 57                                                  |         |

**Supplementary Table 6.**

Mean ( $\pm$  SD)  $^{18}\text{F}$ -FDG-PET SUVR in left and right angular gyrus and inferior temporal gyrus normalized with respect to pons in all patients, patients randomized to receive LMTM as add-on to standard AD treatments, and patients randomized to receive LMTM as monotherapy. Comparisons are with respect to mild AD, MCI, and normal elderly controls as reported by Landau et al. [24].

|                                       | TRx-237-005     |                        |                      | Landau <i>et al.</i> (2011) |                 |                 |
|---------------------------------------|-----------------|------------------------|----------------------|-----------------------------|-----------------|-----------------|
|                                       | All             | LMTM as add-on therapy | LMTM as mono-therapy | ADNI-AD                     | ADNI-MCI        | ADNI-Normal     |
| <b>Left temporal</b>                  | 0.93 $\pm$ 0.16 | 0.92 $\pm$ 0.16        | 0.93 $\pm$ 0.17      | 1.04 $\pm$ 0.16             | 1.16 $\pm$ 0.14 | 1.23 $\pm$ 0.13 |
| <i>p</i> -value (monotherapy vs ADNI) |                 |                        |                      | 0.0032                      | <0.0001         | <0.0001         |
| <b>Right temporal</b>                 | 0.98 $\pm$ 0.18 | 0.97 $\pm$ 0.17        | 0.99 $\pm$ 0.17      | 1.06 $\pm$ 0.17             | 1.16 $\pm$ 0.12 | 1.22 $\pm$ 0.11 |
| <i>p</i> -value (monotherapy vs ADNI) |                 |                        |                      | 0.0163                      | <0.0001         | <0.0001         |
| <b>Left angular</b>                   | 0.98 $\pm$ 0.20 | 0.99 $\pm$ 0.20        | 0.98 $\pm$ 0.20      | 1.06 $\pm$ 0.18             | 1.19 $\pm$ 0.15 | 1.29 $\pm$ 0.15 |
| <i>p</i> -value (monotherapy vs ADNI) |                 |                        |                      | 0.0066                      | <0.0001         | <0.0001         |
| <b>Right angular</b>                  | 0.99 $\pm$ 0.20 | 0.97 $\pm$ 0.20        | 0.98 $\pm$ 0.19      | 1.07 $\pm$ 0.17             | 1.20 $\pm$ 0.15 | 1.29 $\pm$ 0.14 |
| <i>p</i> -value (monotherapy vs ADNI) |                 |                        |                      | 0.0066                      | <0.0001         | <0.0001         |

### Supplementary Table 7.

Primary analysis model for change in ADAS-cog augmented to include two additional rate-correction terms as *baseline-whole-brain-volume x visit* (WBV) and either *baseline-basalis-volume x visit* (NBM) or *baseline-accumbens-volume x visit* (ACC).

|           |        | Comparison A (ADAS-cog)                                          |                                                          |         | Comparison B (ADAS-cog)                                      |                                                        |         | Comparison C (ADAS-cog)                                        |                                                          |         |
|-----------|--------|------------------------------------------------------------------|----------------------------------------------------------|---------|--------------------------------------------------------------|--------------------------------------------------------|---------|----------------------------------------------------------------|----------------------------------------------------------|---------|
|           |        | Change from baseline for 4 mg twice a day, as randomized (n=388) | Difference for 100 mg twice a day, as monotherapy (n=76) | p value | Change from baseline for 4 mg twice a day, as add-on (n=309) | Difference for 4 mg twice a day, as monotherapy (n=79) | p value | Change from baseline for 100 mg twice a day, as add-on (n=297) | Difference for 100 mg twice a day, as monotherapy (n=79) | p value |
| WBV & NBM | Mean   | 6.35                                                             | -2.50                                                    | 0.0378  | 7.09                                                         | -3.64                                                  | 0.0010  | 7.70                                                           | -3.85                                                    | 0.0005  |
|           | 95% CI | 5.32, 7.39                                                       | -4.85, -0.14                                             |         | 5.96, 8.20                                                   | -5.80, -1.48                                           |         | 6.47, 8.94                                                     | -6.01, -1.68                                             |         |
| WBV & ACC | Mean   | 6.96                                                             | -2.06                                                    | 0.0846  | 6.96                                                         | -3.17                                                  | 0.0038  | 7.75                                                           | -3.48                                                    | 0.0015  |
|           | 95% CI | 5.85, 8.07                                                       | -4.40, 0.28                                              |         | 5.85, 8.07                                                   | -5.31, -1.02                                           |         | 6.53, 8.97                                                     | -5.63, -1.33                                             |         |

### Supplementary Fig. 1.

Comparison of decline on the ADAS-cog<sub>11</sub> scale with recent Phase III trials [25, 26] and untreated patients with MMSE 20-26 on the ADAS-cog<sub>13</sub> scale with scores rescaled by 70/85 (<http://adni.loni.usc.edu/data-samples> accessed on 12 Oct 2016)

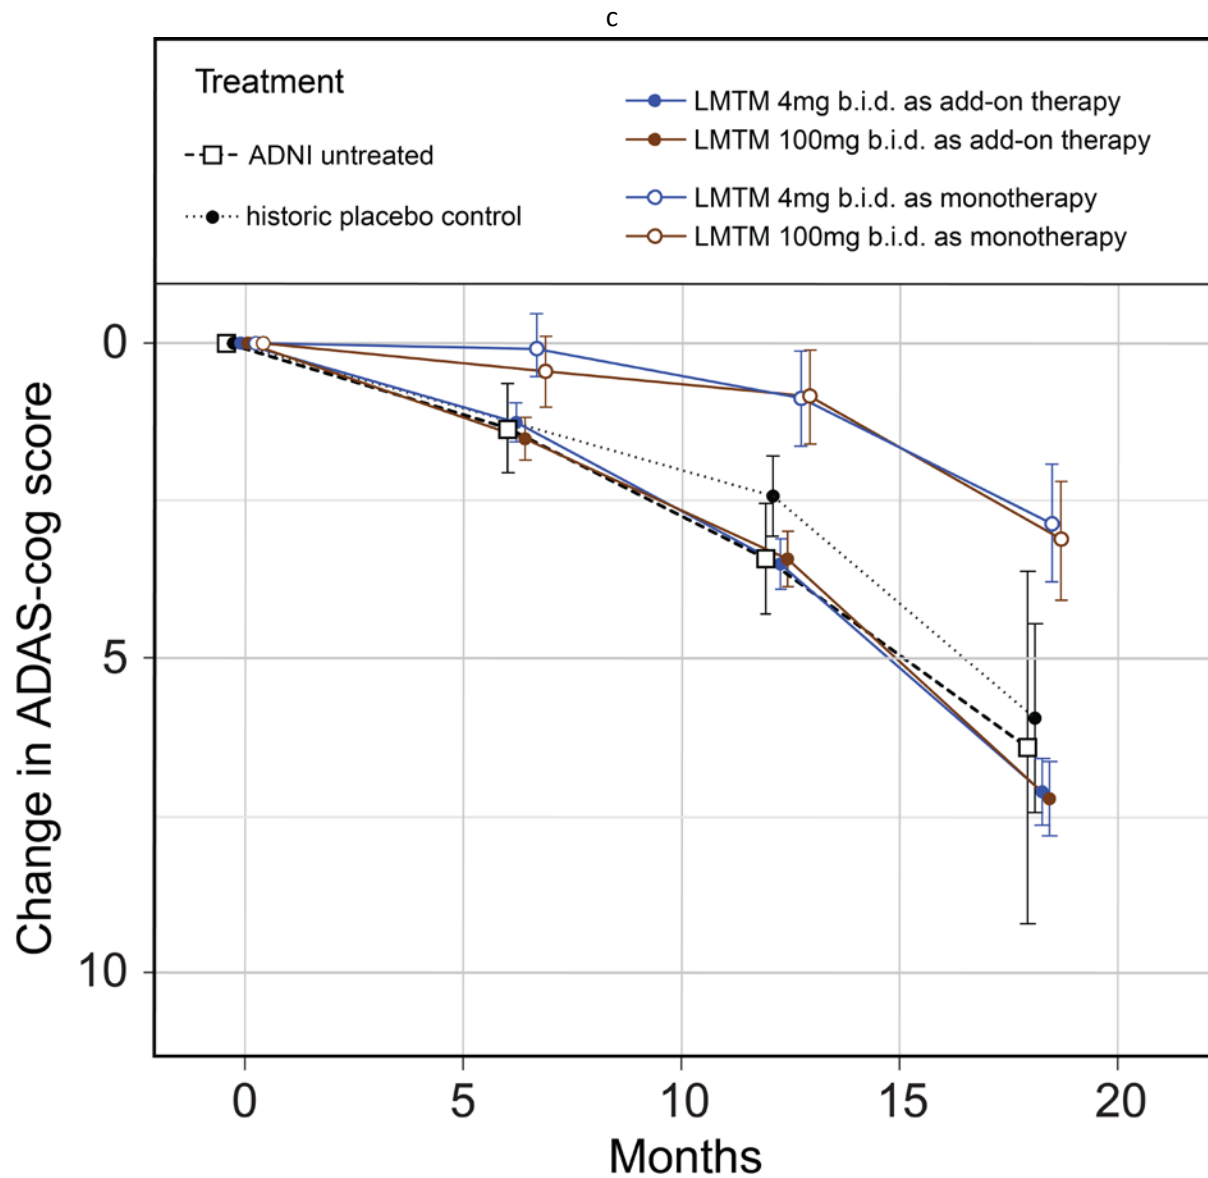

Supplement: jad-61-jad170560-s001.pdf [file jad-61-jad170560-s001.pdf]
